---

Corrigendum

# Learned protein embeddings for machine learning

Kevin K. Yang, Zachary Wu, Claire N. Bedbrook and Frances H. Arnold

---

*Bioinformatics* (2018) <https://doi.org/10.1093/bioinformatics/bty178>

The authors of the above paper wish to inform readers that the following article was incorrectly included as a reference: McIsaac, R.S. *et al.* (2014) Directed evolution of a far-red fluorescent rhodopsin. *Proc. Natl. Acad. Sci. USA*, 111, 13034–13039.

The article which should have appeared in its place is: Engqvist, M.K.M. *et al.* (2015) Directed evolution of *Gloeobacter violaceus* rhodopsin spectral properties. *Journal of Molecular Biology* 427, 205–220.

The paper has been corrected online.
